# Supplementary material
Source: Springer Nature journal article supplement (https://www.springermedizin.de/resource/supplementary/12885_2012_3597_MOESM5_ESM.pdf/9464276)

Protein expression

KIAA0101

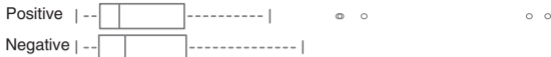

SLC27A2

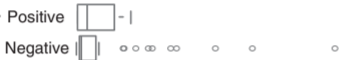

CCNB2

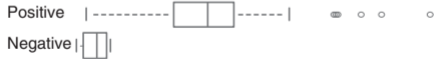

0 20 40 60 80 100

Relative gene expression (log2)

Supplement: MOESM5 [file 9464276]
